# Supplementary material
Source: MDPI journal article supplement (https://www.mdpi.com/1424-2818/14/10/849)
Supplement: s1 [file s1]

## Supplementary Material

Table S1. All species identified represented as the total number of individuals per species and % for each gear: BS25 – 25 m beach seine, BS50 – 50 m beach seine, BT – beam trawl and RP – Riley push net.

| Family         | Species                            | BS25  |       | BS50  |       | BT   |       | P     |       | Total |
|----------------|------------------------------------|-------|-------|-------|-------|------|-------|-------|-------|-------|
|                |                                    | N     | N (%) | N     | N (%) | N    | N (%) | N     | N (%) |       |
| Ammodytidae    | <i>Ammodytes tobianus</i>          | 83    | 100   | 0     | -     | 0    | -     | 0     | -     | 83    |
| Anguillidae    | <i>Anguilla anguilla</i>           | 53    | 28    | 18    | 9     | 100  | 53    | 19    | 10    | 190   |
| Atherinidae    | <i>Atherina</i> spp.               | 72351 | 75    | 18133 | 19    | 811  | 1     | 4684  | 5     | 95979 |
| Balistidae     | <i>Balistes capriscus</i>          | 2     | 100   | 0     | -     | 0    | -     | 0     | -     | 2     |
| Batrachoididae | <i>Halobatrachus didactylus</i>    | 88    | 12    | 57    | 8     | 580  | 80    | 0     | -     | 725   |
| Belonidae      | <i>Belone belone</i>               | 6     | 67    | 3     | 33    | 0    | -     | 0     | -     | 9     |
| Blenniidae     | <i>Parablennius gattorugine</i>    | 74    | 48    | 49    | 32    | 20   | 13    | 12    | 8     | 155   |
|                | <i>Parablennius incognitus</i>     | 0     | -     | 0     | -     | 1    | 100   | 0     | -     | 1     |
|                | <i>Parablennius pilicornis</i>     | 89    | 64    | 11    | 8     | 37   | 27    | 1     | 1     | 138   |
|                | <i>Parablennius sanguinolentus</i> | 0     | -     | 0     | -     | 0    | -     | 1     | 100   | 1     |
|                | <i>Salaria pavo</i>                | 6     | 35    | 1     | 6     | 9    | 53    | 1     | 6     | 17    |
| Bothidae       | <i>Arnoglossus laterna</i>         | 4     | 25    | 0     | -     | 12   | 75    | 0     | -     | 16    |
|                | <i>Arnoglossus thori</i>           | 282   | 52    | 19    | 4     | 237  | 44    | 1     | 0     | 539   |
|                | <i>Bothus podas</i>                | 6     | 16    | 0     | -     | 30   | 79    | 2     | 5     | 38    |
| Callionymidae  | <i>Callionymus lyra</i>            | 0     | -     | 0     | -     | 1    | 100   | 0     | -     | 1     |
|                | <i>Callionymus maculatus</i>       | 76    | 26    | 3     | 1     | 211  | 73    | 1     | 0     | 291   |
|                | <i>Callionymus reticulatus</i>     | 1     | 8     | 0     | -     | 4    | 33    | 7     | 58    | 12    |
|                | <i>Callionymus risso</i>           | 9     | 38    | 0     | -     | 15   | 63    | 0     | -     | 24    |
| Carangidae     | <i>Caranx rhonchus</i>             | 1     | 100   | 0     | -     | 0    | -     | 0     | -     | 1     |
|                | <i>Trachurus trachurus</i>         | 9     | 69    | 4     | 31    | 0    | -     | 0     | -     | 13    |
| Clupeidae      | <i>Alosa fallax</i>                | 0     | -     | 1     | 100   | 0    | -     | 0     | -     | 1     |
|                | <i>Sardina pilchardus</i>          | 11309 | 91    | 1058  | 9     | 6    | 0     | 1     | 0     | 12374 |
| Congridae      | <i>Conger conger</i>               | 3     | 75    | 0     | -     | 1    | 25    | 0     | -     | 4     |
| Engraulidae    | <i>Engraulis encrasicolus</i>      | 702   | 98    | 17    | 2     | 0    | -     | 0     | -     | 719   |
| Gobiesocidae   | <i>Diplecogaster bimaculata</i>    | 5     | 13    | 3     | 8     | 7    | 18    | 24    | 62    | 39    |
|                | <i>Lepadogaster candolii</i>       | 0     | -     | 0     | -     | 1    | 100   | 0     | -     | 1     |
| Gobiidae       | <i>Aphia minuta</i>                | 0     | -     | 0     | -     | 17   | 65    | 9     | 35    | 26    |
|                | <i>Gobius couchi</i>               | 91    | 14    | 78    | 12    | 483  | 72    | 19    | 3     | 671   |
|                | <i>Gobius cruentatus</i>           | 9     | 18    | 1     | 2     | 38   | 75    | 3     | 6     | 51    |
|                | <i>Gobius niger</i>                | 6000  | 34    | 873   | 5     | 9634 | 55    | 1027  | 6     | 17534 |
|                | <i>Gobius paganellus</i>           | 290   | 16    | 307   | 17    | 987  | 54    | 251   | 14    | 1835  |
|                | <i>Pomatoschistus microps</i>      | 460   | 1     | 36    | 0     | 463  | 1     | 64655 | 99    | 65614 |
|                | <i>Pomatoschistus minutus</i>      | 243   | 47    | 6     | 1     | 253  | 49    | 18    | 3     | 520   |
|                | <i>Pomatoschistus pictus</i>       | 24    | 8     | 1     | 0     | 173  | 55    | 114   | 37    | 312   |
| Haemulidae     | <i>Pomadasys incisus</i>           | 1     | 33    | 0     | -     | 0    | -     | 2     | 67    | 3     |
| Labridae       | <i>Centrolabrus exoletus</i>       | 0     | -     | 0     | -     | 1    | 100   | 0     | -     | 1     |
|                | <i>Coris julis</i>                 | 9     | 69    | 1     | 8     | 3    | 23    | 0     | -     | 13    |

|                |                                  |      |     |      |     |      |     |     |     |      |
|----------------|----------------------------------|------|-----|------|-----|------|-----|-----|-----|------|
|                | <i>Ctenolabrus rupestris</i>     | 0    | -   | 3    | 60  | 2    | 40  | 0   | -   | 5    |
|                | <i>Labrus bergylta</i>           | 2    | 25  | 6    | 75  | 0    | -   | 0   | -   | 8    |
|                | <i>Labrus mixtus</i>             | 0    | -   | 1    | 100 | 0    | -   | 0   | -   | 1    |
|                | <i>Labrus viridis</i>            | 13   | 34  | 20   | 53  | 5    | 13  | 0   | -   | 38   |
|                | <i>Symphodus bailloni</i>        | 993  | 39  | 450  | 18  | 899  | 35  | 223 | 9   | 2565 |
|                | <i>Symphodus cinereus</i>        | 2209 | 39  | 222  | 4   | 2984 | 52  | 269 | 5   | 5684 |
|                | <i>Symphodus ocellatus</i>       | 10   | 23  | 33   | 77  | 0    | -   | 0   | -   | 43   |
|                | <i>Symphodus roissali</i>        | 43   | 34  | 53   | 42  | 6    | 5   | 23  | 18  | 125  |
|                | <i>Symphodus rostratus</i>       | 0    | -   | 2    | 100 | 0    | -   | 0   | -   | 2    |
| Moronidae      | <i>Dicentrarchus labrax</i>      | 6392 | 89  | 503  | 7   | 58   | 1   | 226 | 3   | 7179 |
|                | <i>Dicentrarchus punctatus</i>   | 44   | 54  | 38   | 46  | 0    | -   | 0   | -   | 82   |
| Mugilidae      | <i>Chelon labrosus</i>           | 1319 | 71  | 516  | 28  | 0    | -   | 16  | 1   | 1851 |
|                | <i>Chelon auratus</i>            | 1136 | 61  | 731  | 39  | 0    | -   | 0   | -   | 1867 |
|                | <i>Chelon ramada</i>             | 7    | 88  | 1    | 13  | 0    | -   | 0   | -   | 8    |
|                | <i>Chelon saliens</i>            | 96   | 28  | 212  | 61  | 0    | -   | 40  | 11  | 348  |
| Mullidae       | <i>Mullus surmuletus</i>         | 477  | 82  | 82   | 14  | 23   | 4   | 1   | 0   | 583  |
| Pomatomidae    | <i>Pomatomus saltatrix</i>       | 256  | 100 | 0    | -   | 0    | -   | 0   | -   | 256  |
| Rajidae        | <i>Raja undulata</i>             | 2    | 8   | 4    | 16  | 19   | 76  | 0   | -   | 25   |
| Scophthalmidae | <i>Scophthalmus rhombus</i>      | 1    | 100 | 0    | -   | 0    | -   | 0   | -   | 1    |
| Scorpaenidae   | <i>Scorpaena notata</i>          | 125  | 33  | 14   | 4   | 239  | 63  | 3   | 1   | 381  |
|                | <i>Scorpaena porcus</i>          | 620  | 45  | 482  | 35  | 212  | 15  | 67  | 5   | 1381 |
| Serranidae     | <i>Serranus atricauda</i>        | 1    | 100 | 0    | -   | 0    | -   | 0   | -   | 1    |
|                | <i>Serranus cabrilla</i>         | 6    | 86  | 1    | 14  | 0    | -   | 0   | -   | 7    |
|                | <i>Serranus hepatus</i>          | 121  | 81  | 5    | 3   | 21   | 14  | 3   | 2   | 150  |
| Soleidae       | <i>Dicologlossa hexophthalma</i> | 0    | -   | 0    | -   | 2    | 100 | 0   | -   | 2    |
|                | <i>Microchirus azevia</i>        | 3    | 5   | 0    | -   | 59   | 95  | 0   | -   | 62   |
|                | <i>Microchirus boscanion</i>     | 19   | 24  | 0    | -   | 59   | 76  | 0   | -   | 78   |
|                | <i>Microchirus theophila</i>     | 0    | -   | 2    | 100 | 0    | -   | 0   | -   | 2    |
|                | <i>Monochirus hispidus</i>       | 20   | 49  | 0    | -   | 20   | 49  | 1   | 2   | 41   |
|                | <i>Pegusa lascaris</i>           | 4    | 21  | 0    | -   | 15   | 79  | 0   | -   | 19   |
|                | <i>Solea senegalensis</i>        | 3    | 20  | 3    | 20  | 9    | 60  | 0   | -   | 15   |
| Sparidae       | <i>Boops boops</i>               | 389  | 93  | 9    | 2   | 18   | 4   | 1   | 0   | 417  |
|                | <i>Dentex dentex</i>             | 1    | 50  | 0    | -   | 1    | 50  | 0   | -   | 2    |
|                | <i>Dentex macrophthalmus</i>     | 0    | -   | 0    | -   | 0    | -   | 2   | 100 | 2    |
|                | <i>Diplodus annularis</i>        | 1871 | 63  | 135  | 5   | 916  | 31  | 33  | 1   | 2955 |
|                | <i>Diplodus bellottii</i>        | 1250 | 75  | 139  | 8   | 286  | 17  | 0   | -   | 1675 |
|                | <i>Diplodus puntazzo</i>         | 435  | 85  | 59   | 12  | 15   | 3   | 0   | -   | 509  |
|                | <i>Diplodus sargus</i>           | 1285 | 63  | 403  | 20  | 337  | 17  | 0   | -   | 2025 |
|                | <i>Diplodus vulgaris</i>         | 5610 | 62  | 1246 | 14  | 1405 | 15  | 841 | 9   | 9102 |
|                | <i>Lithognathus mormyrus</i>     | 100  | 94  | 1    | 1   | 5    | 5   | 0   | -   | 106  |
|                | <i>Oblada melanura</i>           | 2    | 67  | 1    | 33  | 0    | -   | 0   | -   | 3    |
|                | <i>Pagellus acarne</i>           | 1    | 100 | 0    | -   | 0    | -   | 0   | -   | 1    |
|                | <i>Pagellus bogaraveo</i>        | 15   | 58  | 9    | 35  | 1    | 4   | 1   | 4   | 26   |
|                | <i>Pagellus erythrinus</i>       | 6    | 100 | 0    | -   | 0    | -   | 0   | -   | 6    |
|                | <i>Pagrus auriga</i>             | 1    | 100 | 0    | -   | 0    | -   | 0   | -   | 1    |
|                | <i>Pagrus pagrus</i>             | 4    | 100 | 0    | -   | 0    | -   | 0   | -   | 4    |
|                | <i>Sarpa salpa</i>               | 859  | 48  | 856  | 48  | 76   | 4   | 4   | 0   | 1795 |
|                | <i>Sparus aurata</i>             | 214  | 43  | 259  | 52  | 16   | 3   | 9   | 2   | 498  |
|                | <i>Spicara maena</i>             | 19   | 90  | 0    | -   | 2    | 10  | 0   | -   | 21   |
|                | <i>SpondylIOSoma cantharus</i>   | 5029 | 60  | 958  | 11  | 2077 | 25  | 292 | 3   | 8356 |
| Stromateidae   | <i>Stromateus fiatola</i>        | 0    | -   | 0    | -   | 1    | 100 | 0   | -   | 1    |
| Syngnathidae   | <i>Entelurus aequoreus</i>       | 0    | -   | 0    | -   | 1    | 100 | 0   | -   | 1    |
|                | <i>Hippocampus guttulatus</i>    | 1327 | 44  | 362  | 12  | 1289 | 43  | 31  | 1   | 3009 |
|                | <i>Hippocampus hippocampus</i>   | 171  | 27  | 125  | 20  | 326  | 52  | 10  | 2   | 632  |
|                | <i>Nerophis lumbriciformis</i>   | 0    | -   | 0    | -   | 1    | 25  | 3   | 75  | 4    |
|                | <i>Nerophis ophidion</i>         | 39   | 8   | 11   | 2   | 7    | 1   | 427 | 88  | 484  |

|                |                                  |        |     |       |    |       |     |       |    |        |
|----------------|----------------------------------|--------|-----|-------|----|-------|-----|-------|----|--------|
|                | <i>Syngnathus abaster</i>        | 32     | 3   | 13    | 1  | 29    | 3   | 894   | 92 | 968    |
|                | <i>Syngnathus acus</i>           | 136    | 23  | 147   | 25 | 246   | 42  | 54    | 9  | 583    |
|                | <i>Syngnathus typhle</i>         | 212    | 16  | 100   | 8  | 228   | 17  | 769   | 59 | 1309   |
| Tetraodontidae | <i>Sphoeroides spengleri</i>     | 3      | 38  | 3     | 38 | 2     | 25  | 0     | -  | 8      |
| Torpedinidae   | <i>Torpedo marmorata</i>         | 1      | 100 | 0     | -  | 0     | -   | 0     | -  | 1      |
|                | <i>Torpedo torpedo</i>           | 1      | 50  | 1     | 50 | 0     | -   | 0     | -  | 2      |
| Trachinidae    | <i>Echiichthys vipera</i>        | 0      | -   | 0     | -  | 5     | 100 | 0     | -  | 5      |
|                | <i>Trachinus draco</i>           | 15     | 39  | 0     | -  | 23    | 61  | 0     | -  | 38     |
| Triglidae      | <i>Chelidonichthys cuculus</i>   | 1      | 100 | 0     | -  | 0     | -   | 0     | -  | 1      |
|                | <i>Chelidonichthys lastoviza</i> | 3      | 100 | 0     | -  | 0     | -   | 0     | -  | 3      |
|                | <i>Chelidonichthys obscurus</i>  | 2      | 66  | 0     | -  | 1     | 34  | 0     | -  | 3      |
|                | <i>Lepidotrigla cavillone</i>    | 1      | 25  | 1     | 25 | 2     | 50  | 0     | -  | 4      |
|                | <i>Chelidonichthys lucerna</i>   | 6      | 27  | 16    | 73 | 0     | -   | 0     | -  | 22     |
| Total          |                                  | 125249 |     | 28918 |    | 26083 |     | 75095 |    | 255345 |

Table S2. Generalized linear models results of diversity measures according to sampling gear, presence of vegetation and season. Interactions between gear, vegetation and season included and main area as a fixed effect. Significance codes: \*\*\*  $p < 0.0001$ ; \*\*  $p < 0.01$ ; \*  $p < 0.05$ ;  $p > 0.05$  (non-significant, ns).

| Predictor  | Level                       | Response             |     |                       |     |                      |     |                               |     |                           |     |
|------------|-----------------------------|----------------------|-----|-----------------------|-----|----------------------|-----|-------------------------------|-----|---------------------------|-----|
|            |                             | Species richness (S) |     | Species diversity (H) |     | Species evenness (J) |     | Phylogenetical diversity (PD) |     | Functional diversity (FD) |     |
|            |                             | COEF                 | p   | COEF                  | p   | COEF                 | p   | COEF                          | p   | COEF                      | p   |
| Intercept  | (25mBS/UNVEG/Autumn/Area O) | 7.16                 | *** | 1.56                  | *** | 0.84                 | *** | 89.48                         | *** | 0.21                      | *** |
| Gear       | 50m BS                      | 7.05                 | *** | 0.68                  | *** | 0.01                 | ns  | -4.17                         | ns  | 0.04                      | ns  |
|            | Beam trawl                  | 3.47                 | *** | 0.55                  | *** | 0.09                 | *** | -9.91                         | *** | 0.03                      | ns  |
|            | Pushnet                     | 0.26                 | ns  | -0.51                 | *** | -0.32                | *** | -19.88                        | *** | -0.17                     | *** |
| Vegetation | VEG                         | 4.27                 | *** | 0.44                  | *** | 0.02                 | ns  | -2.46                         | **  | 0.05                      | *** |
| Season     | S                           | 3.29                 | *** | 0.28                  | *** | 0.00                 | ns  | -2.32                         | ns  | 0.01                      | ns  |
|            | SP                          | 0.49                 | ns  | -0.04                 | ns  | -0.04                | **  | 2.47                          | ns  | -0.03                     | *   |
|            | W                           | -1.91                | *** | -0.23                 | *** | -0.02                | ns  | 2.60                          | *   | -0.02                     | ns  |
| Main Area  | C (channel)                 | 0.34                 | ns  | 0.06                  | ns  | 0.01                 | ns  | 0.60                          | ns  | 0.02                      | *   |
|            | I (inner)                   | 0.34                 | ns  | -0.01                 | ns  | -0.01                | ns  | -0.98                         | ns  | 0.00                      | ns  |

| Gear*VEG    | 50mBS-VEG        | -4.35 | ns | -0.27 |     | 0.04  | ns  | 3.05  | ns  | -0.02 | ns  |
|-------------|------------------|-------|----|-------|-----|-------|-----|-------|-----|-------|-----|
|             | Beam trawl - VEG | -0.85 | ns | -0.22 | *   | -0.04 | *   | -2.28 | ns  | -0.02 | ns  |
|             | Pushnet-VEG      | -0.91 | ns | 0.61  | *** | 0.34  | *** | 9.75  | *** | 0.17  | *** |
| Gear*Season | 50mBS-S          | 3.56  | *  | 0.14  | ns  | 0.03  | ns  | -2.43 | ns  | 0.03  | ns  |
|             | BeamTrawl-S      | 0.11  | ns | -0.01 | ns  | 0.02  | ns  | 2.30  | ns  | 0.06  | *   |
|             | Pushnet-S        | -2.86 | *  | -0.24 | ns  | 0.01  | ns  | 6.39  | *   | 0.04  | ns  |
|             | 50mBS-SP         | 1.80  | ns | 0.05  | ns  | 0.01  | ns  | -1.60 | ns  | 0.05  | ns  |
|             | BeamTrawl-SP     | 2.12  | *  | 0.19  | ns  | 0.03  | ns  | -1.53 | ns  | 0.04  | ns  |
|             | Pushnet-SP       | 0.81  | ns | 0.18  | ns  | 0.06  | ns  | 1.69  | ns  | 0.11  | **  |
|             | 50mBS-W          | 0.34  | ns | 0.03  | ns  | -0.02 | ns  | 2.38  | ns  | 0.00  | ns  |
|             | BeamTrawl-W      | 0.89  | ns | 0.08  | ns  | 0.00  | ns  | -1.37 | ns  | -0.04 | ns  |
|             | Pushnet-W        | -0.48 | ns | -0.01 | ns  | 0.03  | ns  | -6.45 | *   | 0.02  | ns  |
